# Supplementary material for: Synthesis of a 3D-network polymer supported Bronsted acid ionic liquid based on calix[4]resorcinarene via two post-functionalization steps: a highly efficient and recyclable acid catalyst for the preparation of symmetrical bisamides
Source: Royal Society of Chemistry journal article supplement (doi:10.1039/c4ra03463e), 2014-01-01
Supplement: c4ra03463e1.pdf [file c4ra03463e1.pdf]

# Supplementary Material

## **Synthesis of the 3D-network polymer supported Bronsted acid ionic liquid based on calix[4]resorcinarene *via* two post-functionalization steps: Highly efficient and recyclable acid catalyst for the preparation of symmetrical bisamides**

Arash Mouradzadegun\*, Somayeh Elahi and Fatemeh Abadast

*Department of Chemistry, Faculty of Science, Shahid Chamran University, Ahvaz, Iran*

*Fax +98(611)3337009; Tel +98(611)3331042*

*\*Corresponding Author E-mail: [arash\\_m@scu.ac.ir](mailto:arash_m@scu.ac.ir)*

| <b>Table of Contents</b>                             | <b>Pages</b> |
|------------------------------------------------------|--------------|
| 1. Characterization of the calix[4]resorcinarene (1) | 2            |
| 2. Characterization of the 3D-network polymer (2)    | 6            |

## 1. Characterization of the calix[4]resorcinarene (1)

**Calix[4]resorcinarene 1**, ( $C_{32}H_{32}O_8$ ): Yield 60%; white powder; m.p.  $> 360\text{ }^{\circ}\text{C}$ ; IR (KBr):  $\nu = 3000\text{--}3500\text{ (OH) cm}^{-1}$ ;  $^1\text{H NMR}$  (400 MHz,  $\text{DMSO-}d_6$ ):  $\delta_{\text{H}} = 1.29\text{--}1.30$  (12H, d,  $\text{CH}_3$ ), 4.43–4.49 (4H, q,  $\text{H}_l$ ), 6.15 (4H, s,  $\text{H}_i$ ), 6.76 (4H, s,  $\text{H}_j$ ), 8.56 (8H, s, OH) ppm.  $^{13}\text{C NMR}$  (100 MHz,  $\text{DMSO-}d_6$ ):  $\delta = 22.0$  (C-m), 29.0 (C-l), 102.5 (C-n), 123.5 (C-i), 125.7 (C-o), 152.3 (C-j) ppm.

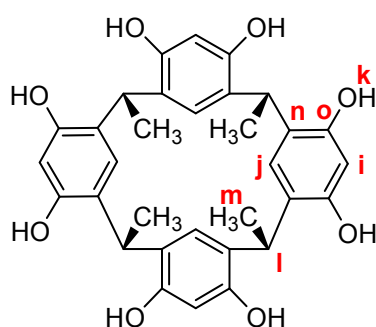

- Copy of the IR,  $^1\text{H}$  NMR and  $^{13}\text{C}$  NMR spectra of the calix[4]resorcinarene:
- IR spectrum of the calix[4]resorcinarene

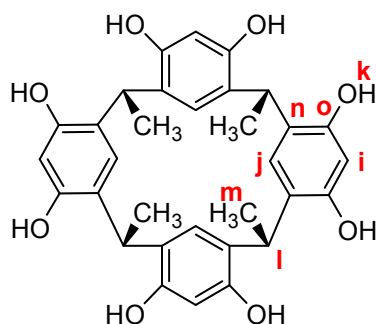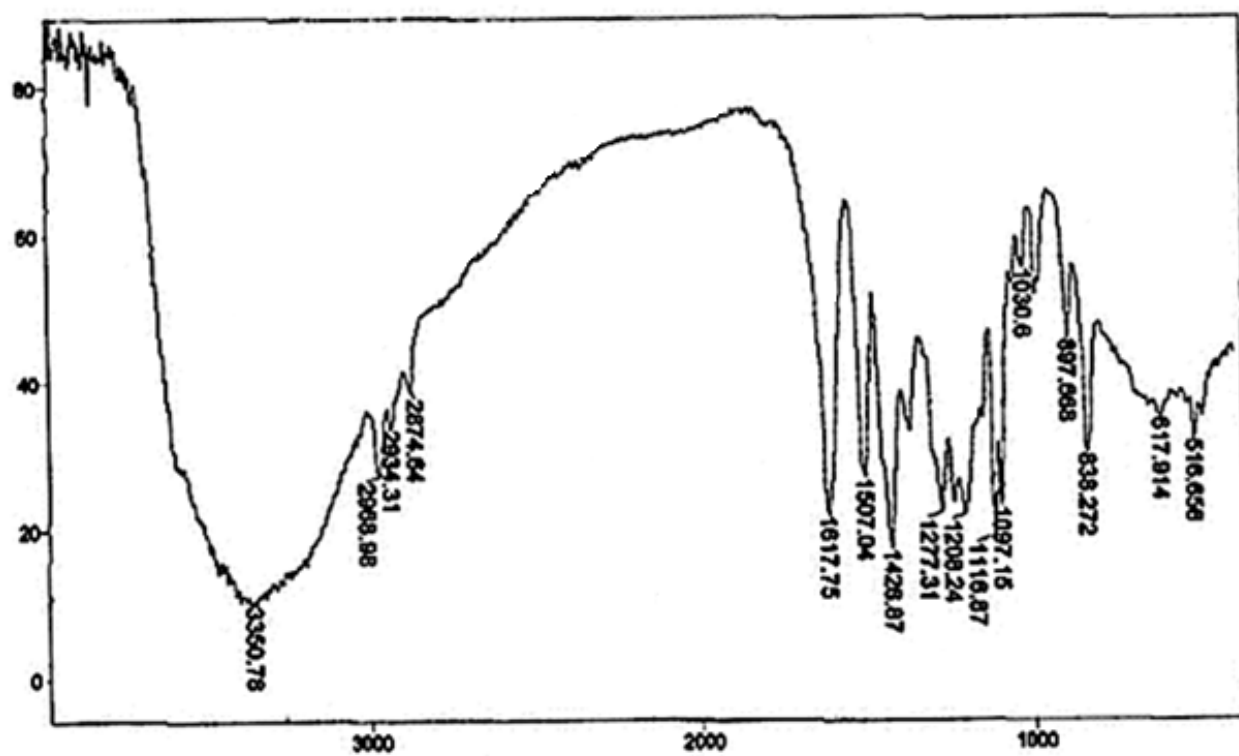

➤ **<sup>1</sup>H NMR spectrum of the calix[4]resorcinarene**

The <sup>1</sup>H NMR spectrum of calix[4]resorcinarene **1** in DMSO-*d*<sub>6</sub> show a doublet signal at δ = 1.29-1.30 ppm (12H) corresponding to four methyl groups (**m**) and a signal at δ = 4.43-4.49 ppm (4H) assignable to four bridging methine (**l**). The protons at C-2 (**i**) and C-5 (**j**) position of resorcinol rings show two single peaks in 1:1 ratio at δ = 6.15 (4H) and 6.76 ppm (4H), respectively. The proton signal related to OH groups of calix[4]resorcinarene (**k**) appear at δ = 8.56 ppm (8H).

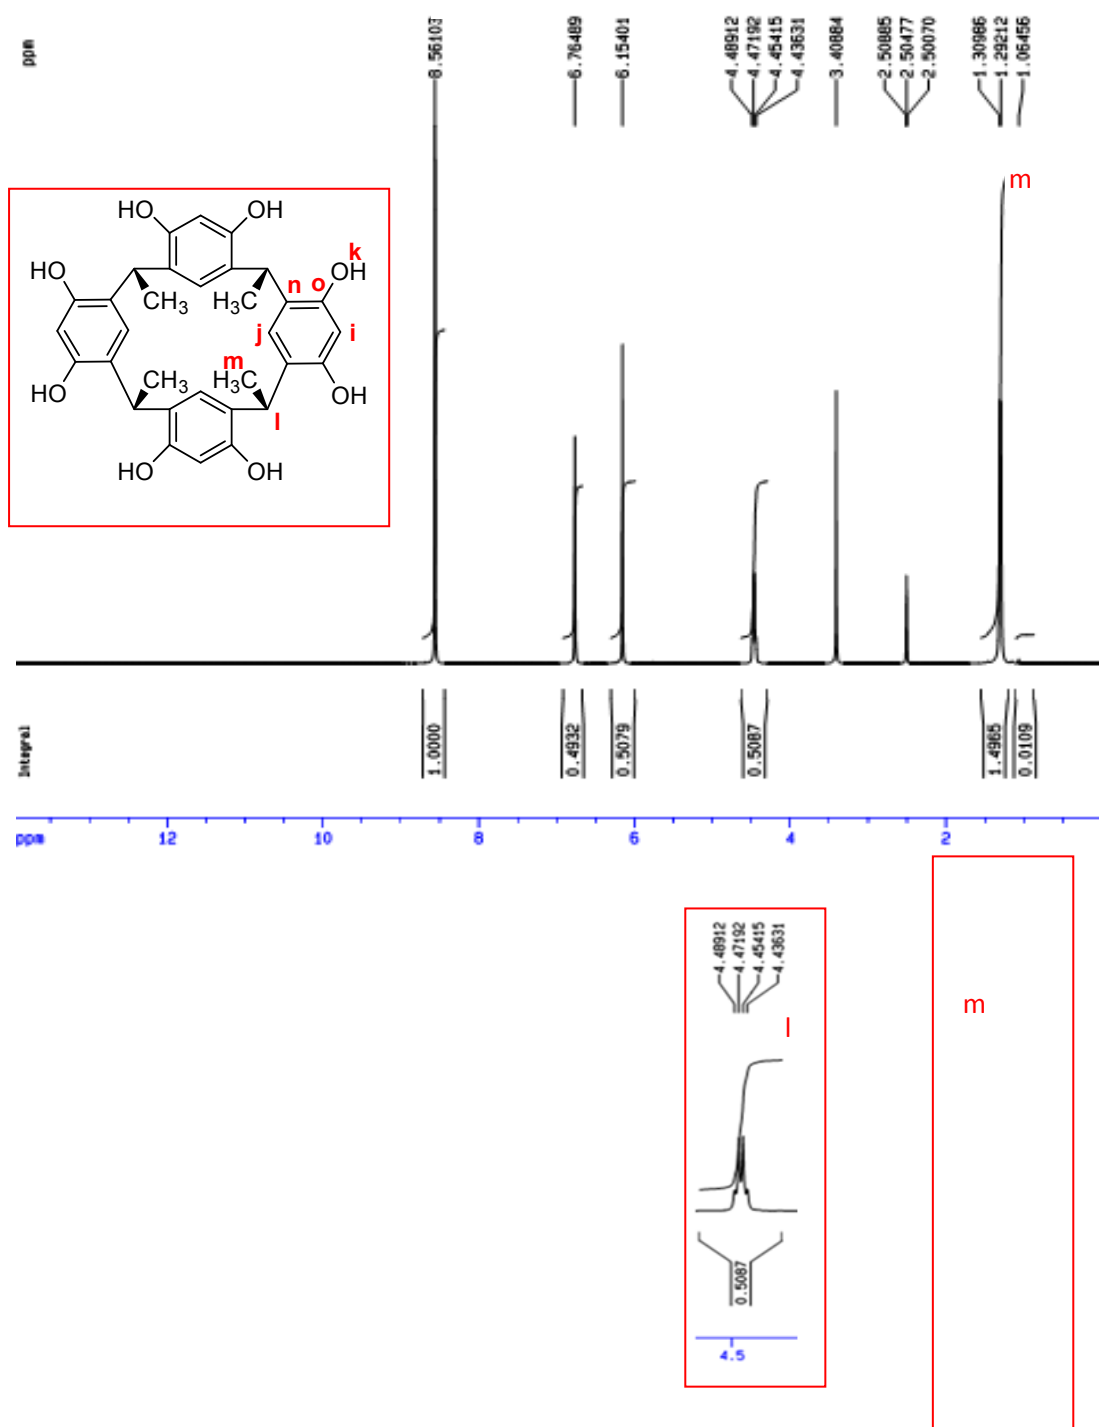

➤  **$^{13}\text{C}$  NMR spectrum of the calix[4]resorcinarene**

The  $^{13}\text{C}$  NMR spectrum in  $\text{DMSO}-d_6$  show two signals at  $\delta = 22.09$  and  $29.04$  ppm caused by four methyl (**m**) and bridging methine (**l**) groups, respectively. The carbon at C-2 (**i**) and C-5 (**j**) position of resorcinol ring show two peaks at  $\delta = 123.55$  and  $152.35$  ppm, respectively. The other carbons of resorcinol ring (**n** & **o**) show two peaks at  $\delta = 102.56$  and  $125.77$  ppm.

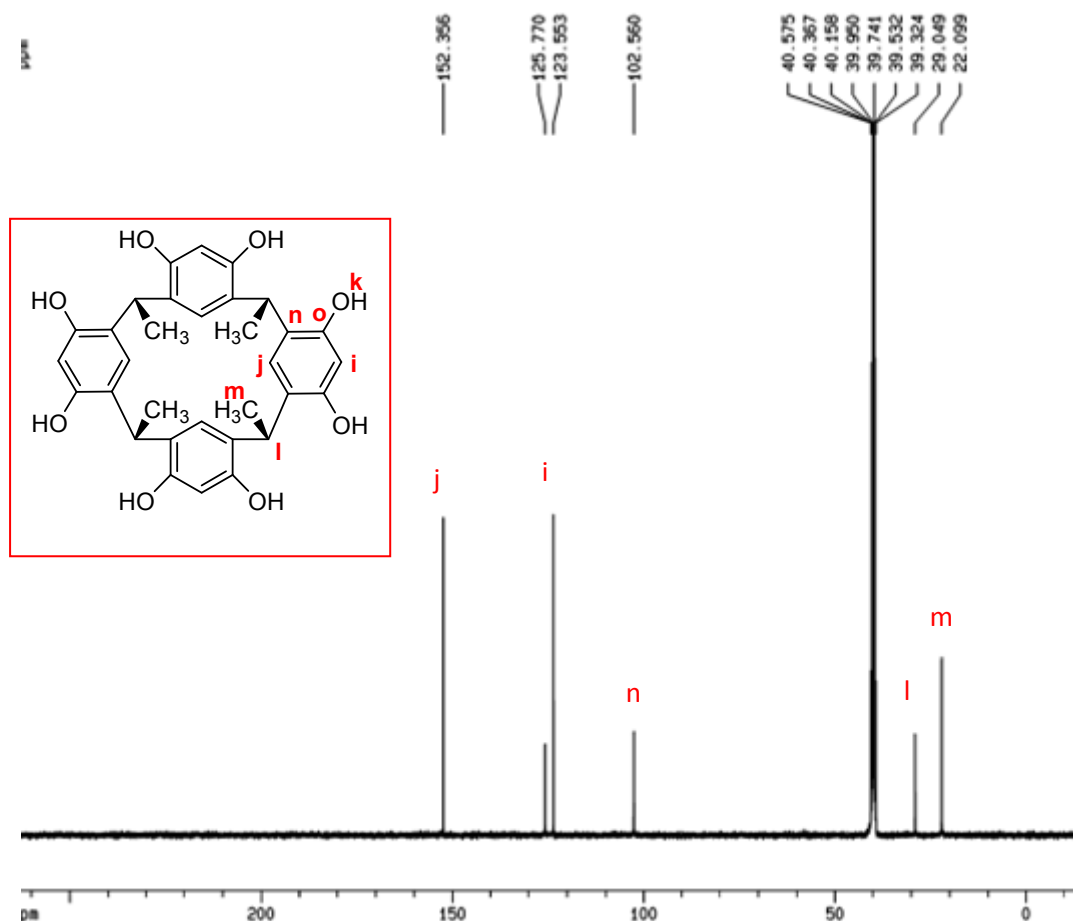

## 2. Characterization of the 3D-network polymer (2)

### ➤ AFM images

In order to gain insight into the surface pores of polymer **2**, atomic force microscopy (AFM) was utilized. All of the AFM scans were taken in ambient air in tapping mode, which is ideal for this kind of polymers. The force between the tip and the sample surface was detected and kept constant throughout the scan and the topography of the surface was obtained (**a**, **b**). Phase data were utilized to supplement the height data because they provide clearer and higher contrast image of structural features. Representative  $1.5\ \mu\text{m} \times 1.5\ \mu\text{m}$  AFM height and phase image suggest a series of pores which have average surface diameter of 300 nm (**a**). More details could be obtained from 3D height plot (**b**). On the whole, AFM revealed that the 3D-network polymer **2** exhibited a porous surface that has the ability for the inclusion of an organic guest.

(a)

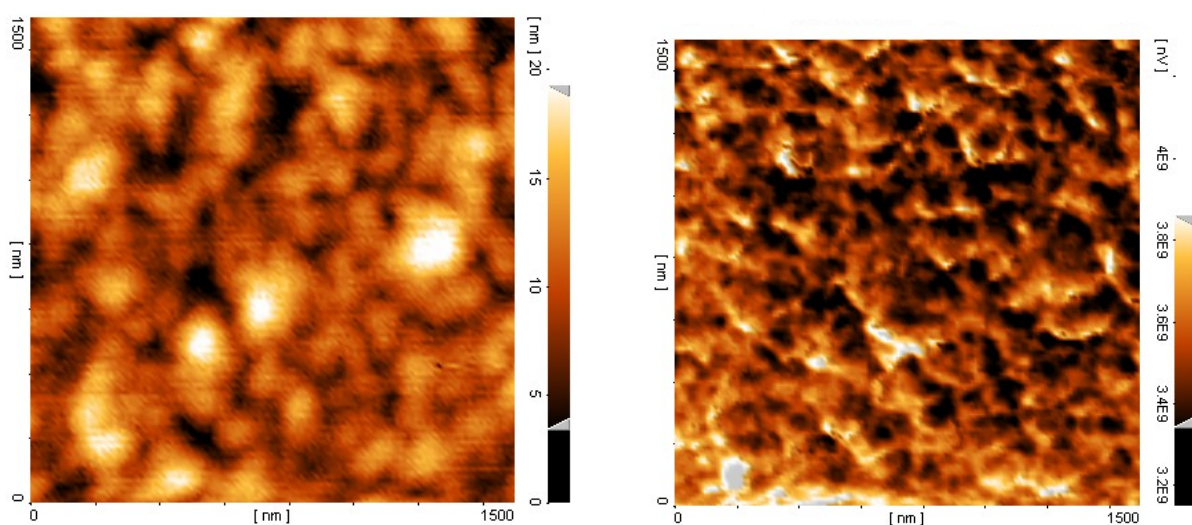

(b)

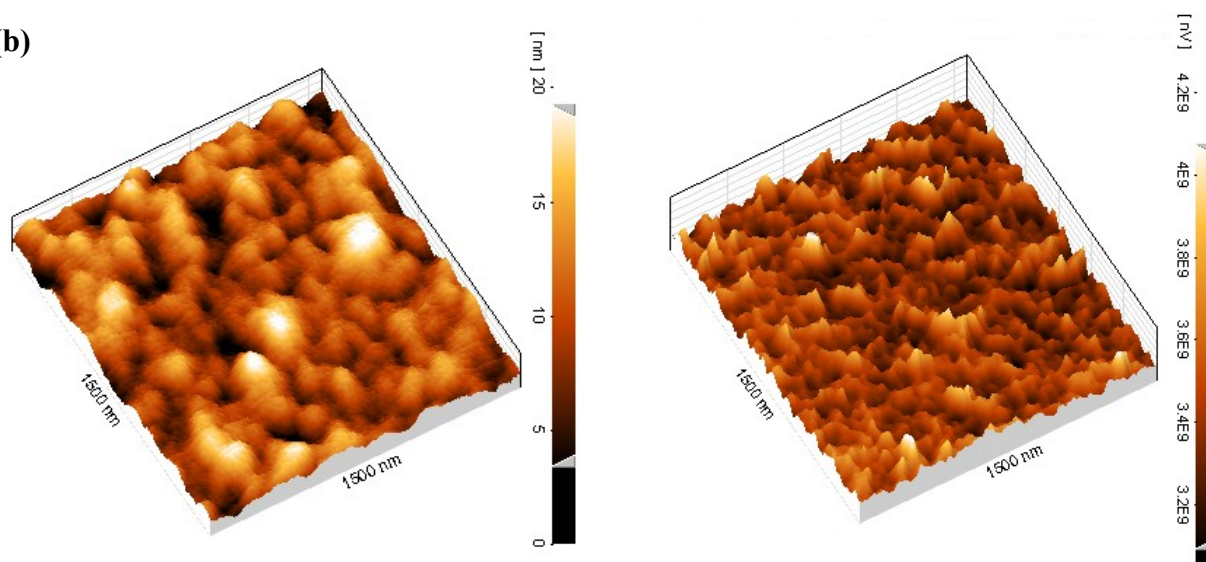

AFM images ( $1.5\ \mu\text{m} \times 1.5\ \mu\text{m}$ ) of the polymer **2** (a) 2D height and phase plot and (b) 3D height and phase plot.

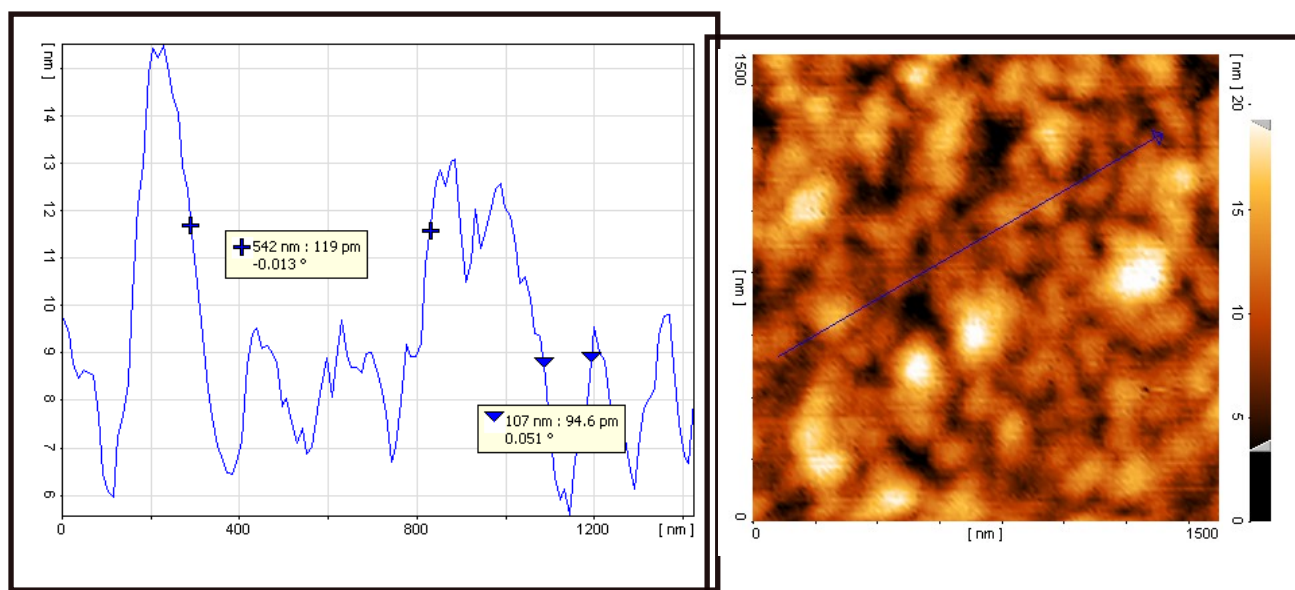

Image profile (the analysis of height along a linear path).

Peak-to-valley measurements of the polymer showed a very good performance of surface morphology and suggest a series of pores which have average surface diameter of 300 nm.

### ➤ X-ray diffraction

The XRD patterns of the prepared network polymer and calix[4]resorcinarene are depicted. It seems that based on the intense and sharp diffraction peaks of calix[4]resorcinarene, it exhibited a high degree of crystallinity. This may be attributed to the hydrogen bondings between the resorcinarene units (a). As it can be seen in this figure, most of the peaks in the XRD patterns of the calix[4]resorcinarene samples can be completely indexed with resorcinol in the standard card (JCPDS No. 00-038-1969). It can be observed that when the calix[4]resorcinarene is incorporated into a polymer system crystalline peaks still exist, but the intensities of the peaks decrease and a broad spectrum appears. In other words, the amorphous nature of the polymer increases (b). Some distinct peaks were observed for the network polymer which indicated that the network polymer molecules have the semi crystalline nature but broad spectrum shows that its composition consists predominantly of an amorphous phase.

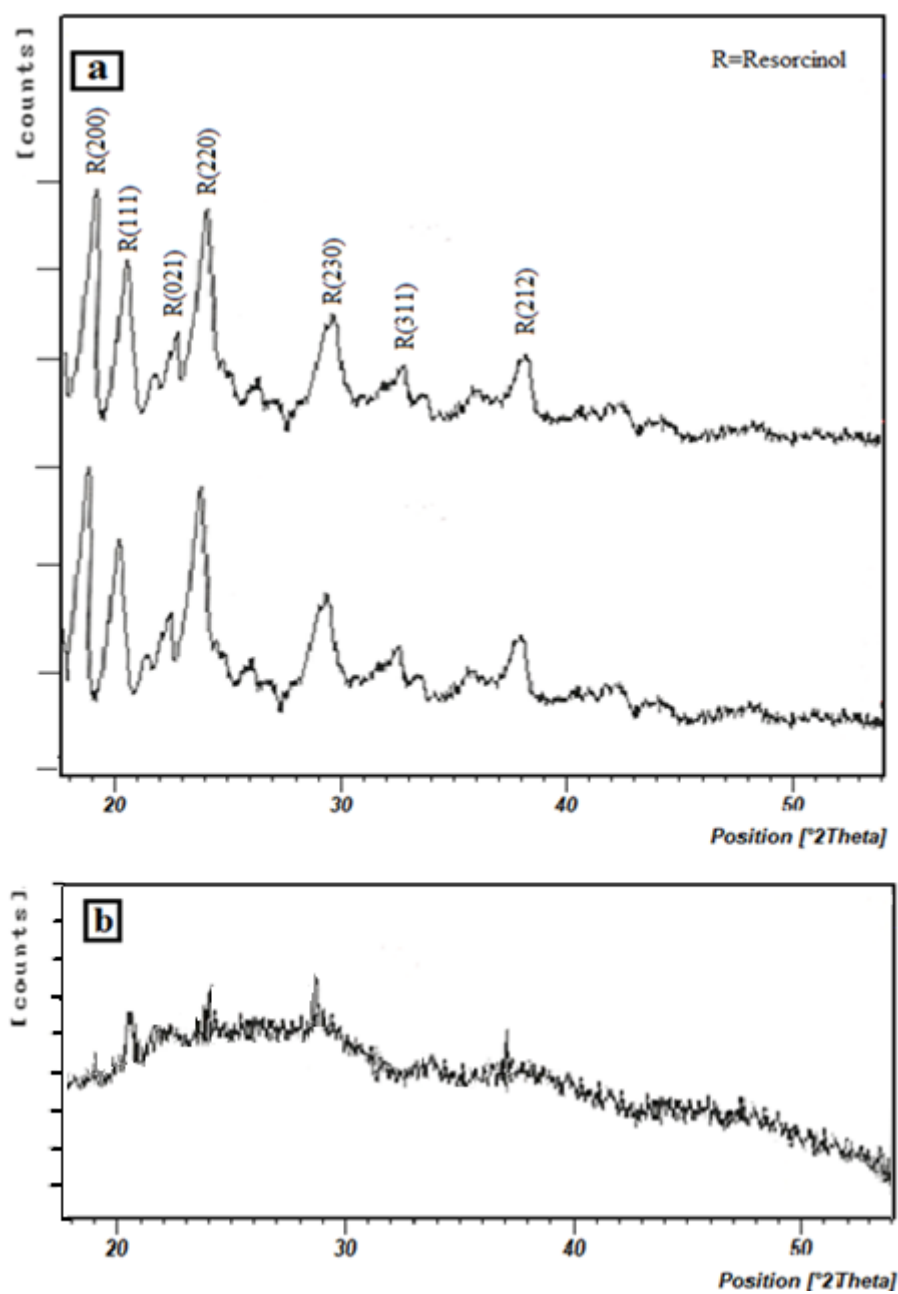

XRD pattern: (a) calix[4]resorcinarene (b) polymer



➤ **SEM image**

In this image, one can observe that more porous structure with meshwork was obtained for the network polymer. SEM confirmed that the average size of the pores of the network polymer is in agreement with the AFM data.

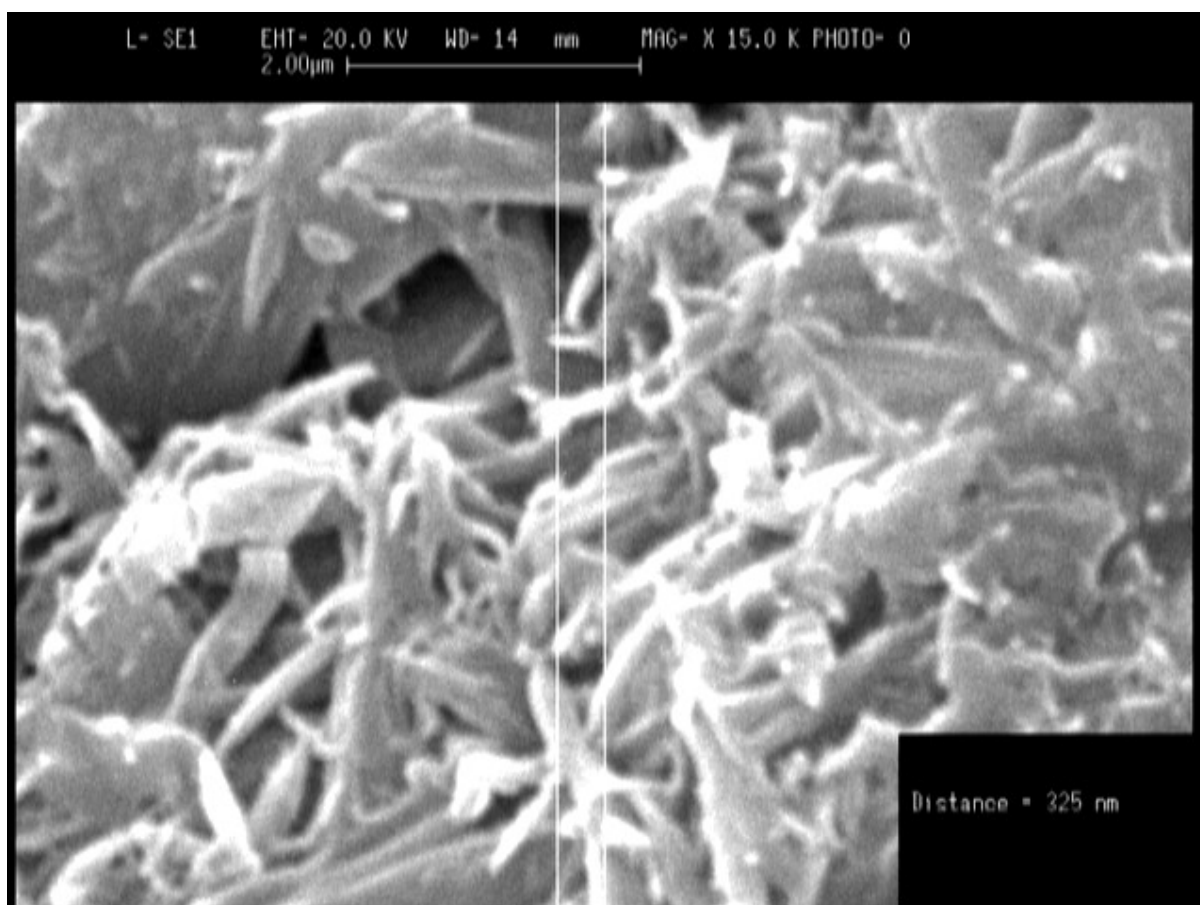

**SEM image of the polymer (2)**

➤ **TGA curve**

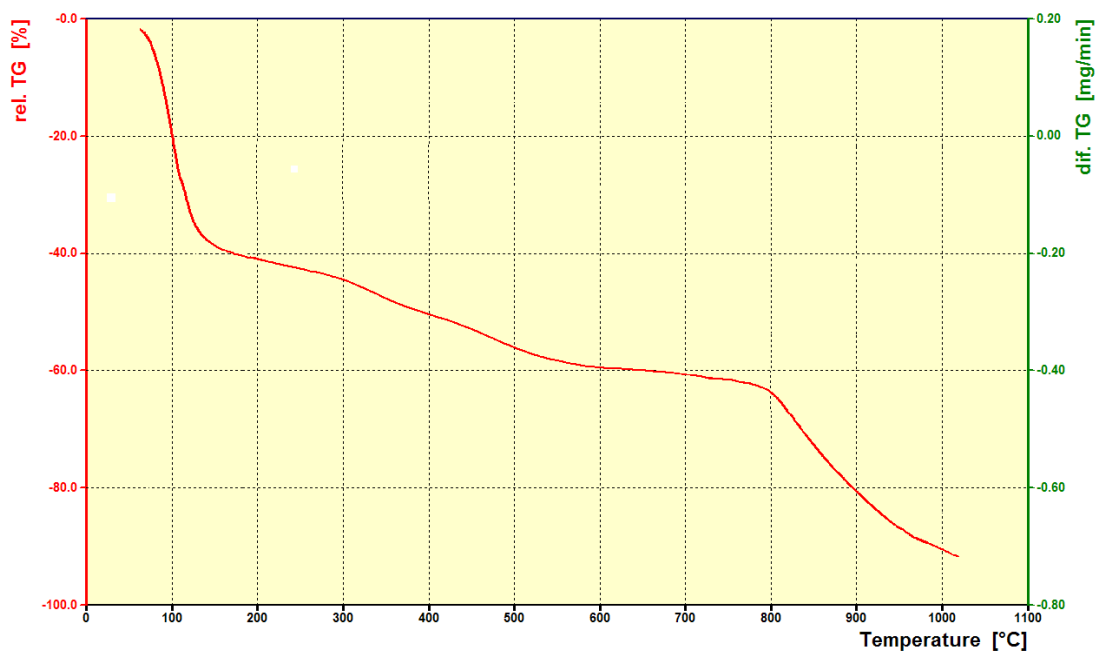

**TGA curve of the polymer (2)**
